# Supplementary material
Source: PubMed Central journal article supplement (PMC2754281)
Supplement: NIHMS81871-supplement-SuppleFig_Tables.pdf [file NIHMS81871-supplement-SuppleFig_Tables.pdf]

## Supplementary Figure 1

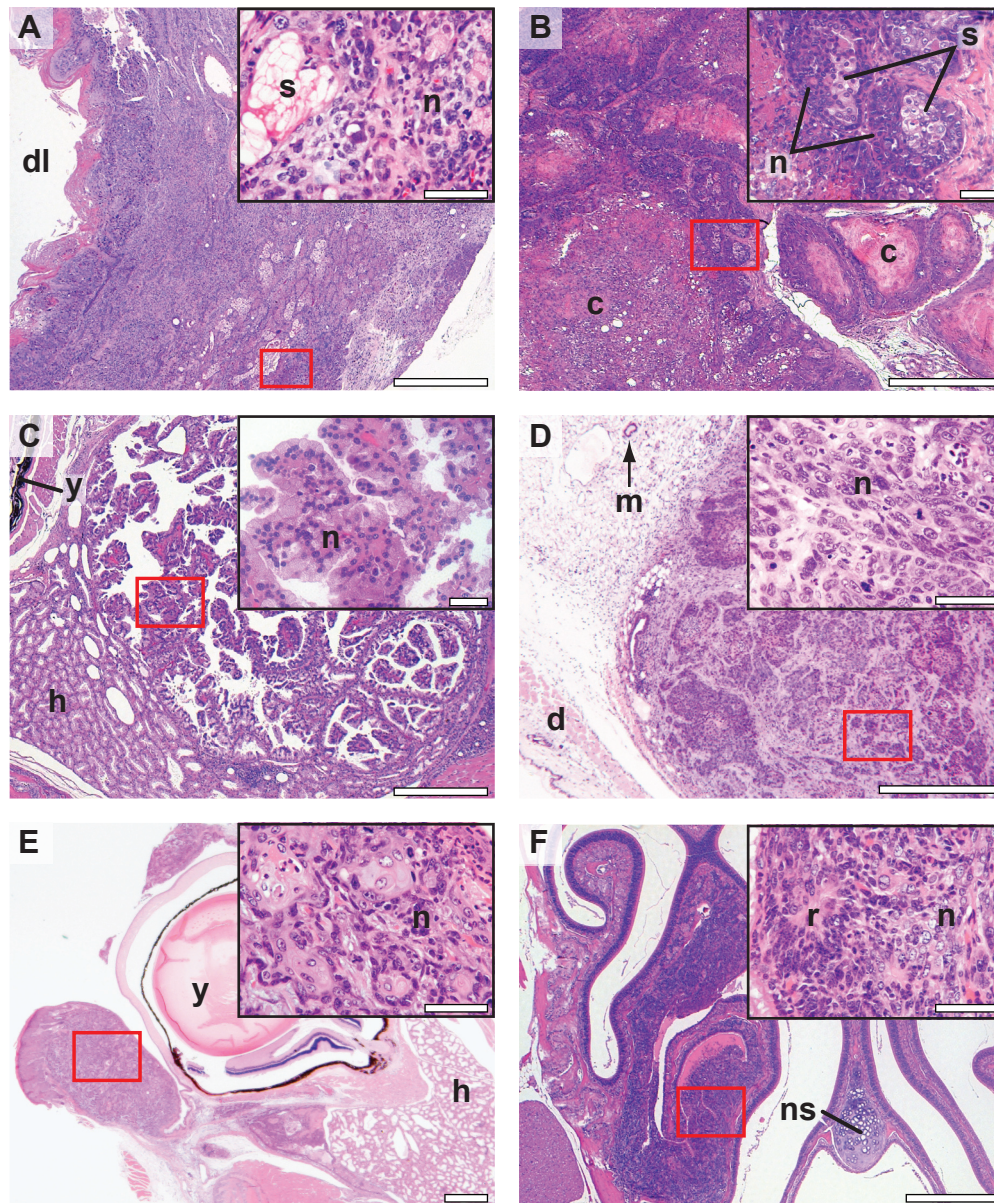

**Supplementary Figure 1.** Histology of tumors characteristic for *Rad51c* mutants. (A) Preputial gland carcinoma in a *DH-cis* male. (B) Zymbal's gland carcinoma in a *DH-cis* male; (C) Harderian gland adenoma in a *Rad51c*<sup>ko/+</sup> male. (D) Mammary gland carcinoma in a *DH-cis* female. (E) Basal cell carcinoma, skin/subcutis, possibly Meibomian gland, in a *DH-cis* female; (F) Neuroepithelial carcinoma in a *DH-cis* male; Bowman's gland area, nasal section. Area shown in insets is marked with a red frame in each respective figure. s, normal sebaceous cells; n, neoplastic epithelial cells; dl, duct lumen; c, sebaceous cyst lumen; y, eye; h, Harderian gland; ns, nasal septum; r, neural rosettes. Scale bar corresponds to 500  $\mu$ m in the main figures and to 50  $\mu$ m in the insets.

## Supplementary Figure 2

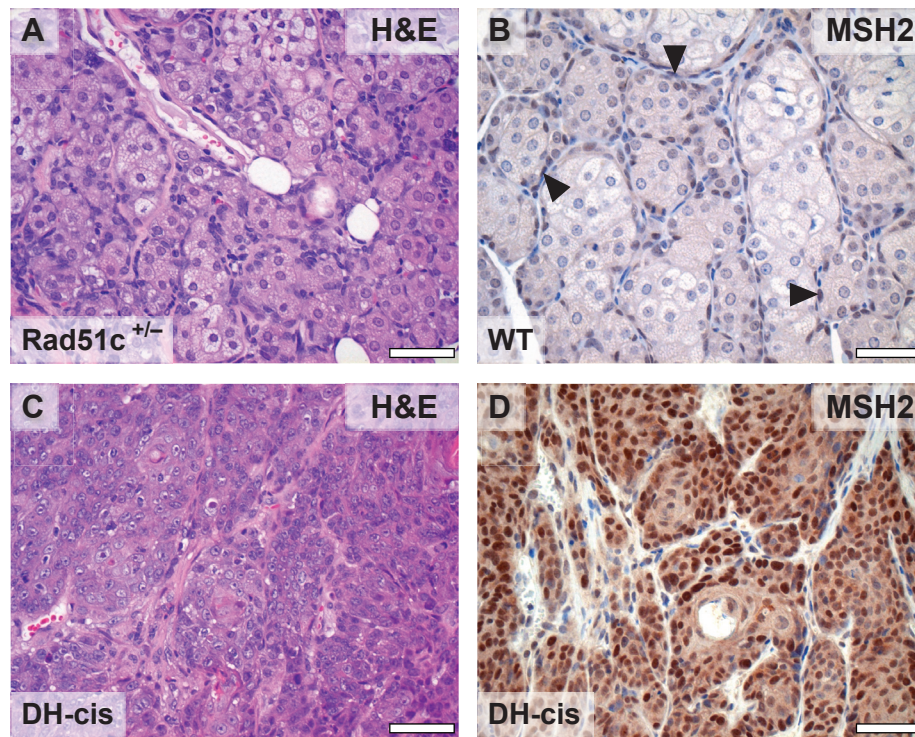

**Supplementary Figure 2.** Msh2 is not downregulated in preputial gland carcinomas in *DH-cis* mice. (A and B) normal control preputial gland stained with hematoxylin and eosin (H&E) and with antibodies against Msh2 (MSH2), respectively. Arrowheads indicate Msh2-positive basal cells. (C and D) Preputial gland carcinoma from a *DH-cis* male stained the same way as the controls. Note the number of cells staining strongly positive for Msh2 in (D). Genotype is indicated in the lower left corner for each image. Scale bar corresponds to 50  $\mu$ m.

**Supplementary Table 1. *Rad51c* is essential for embryo viability.**

| Developmental stage | Number of litters dissected | Total number of embryos | Portion of Phenotypically abnormal embryos |         | Portion of Phenotypically normal embryos |           | Empty decidua, lost, or genotype not determined | Deviation from expected mendelian distribution <sup>†</sup> , <i>P</i> -value ( $\chi^2$ -test) |
|---------------------|-----------------------------|-------------------------|--------------------------------------------|---------|------------------------------------------|-----------|-------------------------------------------------|-------------------------------------------------------------------------------------------------|
|                     |                             |                         | ko/ko                                      | ko/+    | ko/+                                     | +/+       |                                                 |                                                                                                 |
| E5.5                | 2                           | 22                      | 5 (23%)                                    |         | 17 (77%)                                 |           | 0                                               | 0.805                                                                                           |
| E6.5                | 5                           | 57                      | 12 (21%)                                   |         | 44 (79%)                                 |           | 1                                               | 0.531                                                                                           |
| E7.5*               | 12                          | 132                     | 38 (29%)                                   |         | 94 (71%)                                 |           | 1                                               | 0.236                                                                                           |
|                     | 3                           | 31                      | 5 (18%)                                    | 0 (0%)  | 21 (68%)                                 | 5 (16%)   | 1                                               | 0.272                                                                                           |
| E8.5*               | 12                          | 126                     | 49 (39%)                                   |         | 77 (61%)                                 |           | 0                                               | <b>0.0004</b>                                                                                   |
|                     | 5                           | 50                      | 16 (32%)                                   | 2 (13%) | 18 (36%)                                 | 14 (28%)  | 6                                               | 0.540                                                                                           |
| E10.5*              | 5                           | 51                      | 14 (27%) <sup>§</sup>                      |         | 37 (73%)                                 |           | 0                                               | 0.686                                                                                           |
|                     | 2                           | 22                      | 5 (23%) <sup>§</sup>                       | 0 (0%)  | 8 (36%)                                  | 9 (39%)   | 1                                               | 0.213                                                                                           |
| Newborn             | 59                          | 395                     | 0 (0%)                                     | 0 (0%)  | 239 (61%)                                | 256 (39%) | 0                                               | <b>2.723E-30 (0.009)<sup>‡</sup></b>                                                            |

\*Shaded fields indicate litters, from which embryos have been genotyped.

<sup>†</sup>Deviation from the Mendelian 1:2:1 genotype and 1:3 phenotype ratio was tested.

Statistically significant differences are highlighted in bold.

<sup>‡</sup>The number of *Rad51c*<sup>ko/+</sup> and wild-type progeny was tested against 2:1 ratio.

<sup>§</sup>Embryos were almost resorbed.

**Supplementary Table 2.** Complete list of observed neoplasms grouped by target organ, gender, and genotype.

| Target organ and tumor type                    | Females |                        |                       |          |        | Males |                        |                       |          |        |
|------------------------------------------------|---------|------------------------|-----------------------|----------|--------|-------|------------------------|-----------------------|----------|--------|
|                                                | WT      | Rad51c <sup>ko/+</sup> | Trp53 <sup>ko/+</sup> | DH-trans | DH-cis | WT    | Rad51c <sup>ko/+</sup> | Trp53 <sup>ko/+</sup> | DH-trans | DH-cis |
| <b>Adrenal</b>                                 |         |                        |                       |          |        |       |                        |                       |          |        |
| Pheochromocytoma                               | -       | -                      | -                     | -        | -      | -     | -                      | -                     | 1        | -      |
| <b>Bone</b>                                    |         |                        |                       |          |        |       |                        |                       |          |        |
| Osteosarcoma                                   | -       | 2                      | 5                     | 11       | 7      | -     | -                      | -                     | 1        | -      |
| <b>Cecum</b>                                   |         |                        |                       |          |        |       |                        |                       |          |        |
| Adenoma                                        | -       | -                      | -                     | -        | -      | -     | 1                      | -                     | -        | -      |
| <b>Epididimis</b>                              |         |                        |                       |          |        |       |                        |                       |          |        |
| Hemangioma                                     | -       | -                      | -                     | -        | -      | -     | -                      | -                     | -        | 1      |
| <b>Fat pads, gonadal</b>                       |         |                        |                       |          |        |       |                        |                       |          |        |
| Hemangiosarcoma                                | -       | -                      | -                     | -        | -      | -     | -                      | -                     | -        | 1      |
| <b>Hematopoietic neoplasm</b>                  |         |                        |                       |          |        |       |                        |                       |          |        |
| Lymphoma, small cell                           | -       | -                      | -                     | 1        | 2      | -     | -                      | 1                     | -        | -      |
| Lymphoma, follicular center cell (B-cell)      | -       | 1                      | 1                     | 4        | 1      | -     | -                      | 1                     | -        | 2      |
| Lymphoma, diffuse large cell (B-cell)          | -       | -                      | -                     | -        | -      | -     | -                      | -                     | 1        | -      |
| Lymphoma, splenic marginal zone                | -       | -                      | -                     | 1        | -      | -     | -                      | -                     | -        | -      |
| Lymphoma, NOS                                  | -       | -                      | 1                     | 1        | -      | -     | -                      | 1                     | 1        | 1      |
| Histiocytic sarcoma                            | -       | -                      | -                     | 2        | -      | -     | -                      | 2                     | 1        | -      |
| Mast cell sarcoma                              | -       | -                      | -                     | 1        | -      | -     | -                      | -                     | -        | 2      |
| <b>Liver</b>                                   |         |                        |                       |          |        |       |                        |                       |          |        |
| Adenoma, hepatocellular                        | -       | -                      | -                     | -        | -      | -     | -                      | -                     | 1        | -      |
| Cholangiocarcinoma                             | -       | -                      | -                     | -        | -      | -     | -                      | -                     | 1        | -      |
| <b>Lung</b>                                    |         |                        |                       |          |        |       |                        |                       |          |        |
| Adenoma, alveolar Type II cell                 | -       | 2                      | -                     | 2        | -      | -     | 2                      | 3                     | 1        | 1      |
| Carcinoma, alveolar Type II cells              | -       | 2                      | -                     | -        | -      | 1     | 1                      | 3                     | -        | -      |
| <b>Mammary gland</b>                           |         |                        |                       |          |        |       |                        |                       |          |        |
| Adenocarcinoma                                 | -       | 2                      | 3                     | 1        | 7      | -     | -                      | -                     | -        | -      |
| <b>Muscle</b>                                  |         |                        |                       |          |        |       |                        |                       |          |        |
| Rhabdomyosarcoma                               | -       | -                      | -                     | -        | 2      | -     | -                      | 5                     | 5        | 1      |
| Sarcoma, NOS                                   | -       | -                      | -                     | -        | -      | -     | 1                      | 6                     | 8        | 5      |
| Hemangiosarcoma                                | -       | -                      | 1                     | -        | -      | -     | -                      | -                     | -        | -      |
| <b>Mediastinum</b>                             |         |                        |                       |          |        |       |                        |                       |          |        |
| Myxosarcoma                                    | -       | -                      | -                     | 1        | -      | -     | -                      | -                     | -        | -      |
| <b>Mesentery</b>                               |         |                        |                       |          |        |       |                        |                       |          |        |
| Hemangiosarcoma                                | -       | -                      | -                     | -        | -      | -     | -                      | -                     | -        | 1      |
| <b>Ovary</b>                                   |         |                        |                       |          |        |       |                        |                       |          |        |
| Cystadenoma                                    | -       | -                      | -                     | -        | -      | -     | -                      | -                     | -        | -      |
| Granulosa cell tumor                           | -       | -                      | -                     | -        | -      | -     | -                      | -                     | -        | -      |
| Hemangiosarcoma                                | -       | -                      | -                     | 1        | 2      | -     | -                      | -                     | -        | -      |
| <b>Pituitary</b>                               |         |                        |                       |          |        |       |                        |                       |          |        |
| Adenoma, pars distalis                         | 2       | 2                      | -                     | -        | 1      | -     | -                      | -                     | -        | -      |
| <b>Salivary gland</b>                          |         |                        |                       |          |        |       |                        |                       |          |        |
| Myoepithelioma                                 | -       | -                      | -                     | -        | 1      | -     | -                      | -                     | -        | -      |
| <b>Sebaceous glands</b>                        |         |                        |                       |          |        |       |                        |                       |          |        |
| Preputial gland carcinoma                      | -       | -                      | -                     | -        | -      | -     | -                      | -                     | 1        | 10     |
| Zymbal's gland adenocarcinoma                  | -       | -                      | -                     | 2        | -      | -     | -                      | 1                     | -        | 5      |
| <b>Spinal cord</b>                             |         |                        |                       |          |        |       |                        |                       |          |        |
| Neurofibrosarcoma                              | -       | -                      | -                     | -        | -      | -     | -                      | -                     | -        | 1      |
| <b>Spleen</b>                                  |         |                        |                       |          |        |       |                        |                       |          |        |
| Hemangiosarcoma                                | -       | -                      | -                     | -        | 1      | -     | -                      | -                     | -        | -      |
| <b>Skin</b>                                    |         |                        |                       |          |        |       |                        |                       |          |        |
| Hemangiosarcoma                                | -       | -                      | 1                     | -        | 1      | -     | -                      | -                     | -        | -      |
| Myxosarcoma / myxoma                           | -       | -                      | -                     | -        | -      | -     | -                      | -                     | 1        | -      |
| Squamous cell papilloma                        | -       | -                      | -                     | -        | 2      | -     | -                      | -                     | -        | -      |
| Squamous cell carcinoma                        | -       | -                      | -                     | -        | 1      | -     | -                      | -                     | 1        | 2      |
| Sarcoma, NOS                                   | -       | -                      | -                     | -        | -      | -     | -                      | -                     | 1        | -      |
| Mast cell tumor                                | -       | -                      | -                     | -        | -      | 1     | -                      | -                     | -        | -      |
| Trichoepithelioma                              | -       | -                      | -                     | -        | -      | -     | -                      | -                     | -        | -      |
| <b>Testis</b>                                  |         |                        |                       |          |        |       |                        |                       |          |        |
| Neoplasm, NOS                                  | -       | -                      | -                     | -        | -      | 1     | -                      | -                     | -        | -      |
| <b>Thyroid</b>                                 |         |                        |                       |          |        |       |                        |                       |          |        |
| Adenoma, follicular cells                      | -       | -                      | -                     | -        | 1      | -     | -                      | -                     | -        | -      |
| <b>Urinary bladder</b>                         |         |                        |                       |          |        |       |                        |                       |          |        |
| Submucosal mesenchymal tumor                   | -       | -                      | 1                     | -        | -      | -     | -                      | -                     | -        | -      |
| <b>Uterus</b>                                  |         |                        |                       |          |        |       |                        |                       |          |        |
| Polyp, endometrial                             | -       | -                      | -                     | -        | 2      | -     | -                      | -                     | -        | -      |
| Leiomyoma                                      | -       | -                      | -                     | 1        | -      | -     | -                      | -                     | -        | -      |
| Hemangiosarcoma                                | -       | -                      | -                     | -        | -      | -     | -                      | -                     | -        | -      |
| <b>Muzzle area</b>                             |         |                        |                       |          |        |       |                        |                       |          |        |
| Harderian gland adenoma / carcinoma            | 1       | 1                      | -                     | -        | -      | -     | 2                      | 1                     | 1        | 1      |
| Bowman's gland neuroepithelial carcinoma       | -       | -                      | -                     | -        | -      | -     | -                      | 1                     | -        | 1      |
| Olfactory neuroblastoma                        | -       | -                      | -                     | 1        | 1      | -     | -                      | -                     | -        | 1      |
| Meibomian gland, squamous cell carcinoma       | -       | -                      | -                     | -        | 1      | -     | -                      | -                     | -        | 1      |
| Vomer nasal neuroepithelial carcinoma          | -       | -                      | -                     | -        | 1      | -     | -                      | -                     | -        | -      |
| Squamous cell carcinoma                        | -       | -                      | -                     | -        | 1      | -     | -                      | -                     | -        | 1      |
| Carcinoma, NOS                                 | -       | -                      | -                     | -        | -      | -     | -                      | -                     | 1        | -      |
| <b>Total number of animals</b>                 | 17      | 38                     | 11                    | 26       | 23     | 21    | 32                     | 20                    | 24       | 24     |
| <b>Number of animals that died by 600 days</b> | 2       | 12                     | 10                    | 25       | 23     | 3     | 9                      | 16                    | 23       | 23     |
| <b>Total number of animals with neoplasms</b>  | 2       | 7                      | 8                     | 21       | 22     | 2     | 6                      | 16                    | 22       | 22     |
| <b>Total number of primary neoplasms</b>       | 3       | 12                     | 13                    | 30       | 35     | 2     | 7                      | 25                    | 27       | 38     |

**Supplementary Table 3.** Quantification of Rad51 and  $\gamma$ H2AX foci in *Rad51c*-deficient and control MEFs.

| Genotype                                                       | Treatment | Total number of cells counted | Average number of Rad51 foci per cell | Average number of $\gamma$ H2AX foci per cell | P-value*         |
|----------------------------------------------------------------|-----------|-------------------------------|---------------------------------------|-----------------------------------------------|------------------|
| <i>wt</i>                                                      | none      | 62                            | 2.3                                   | 4.5                                           | n.a.             |
| <i>Rad51c</i> <sup>ko/+</sup>                                  | none      | 64                            | 2.0                                   | 3.4                                           | 0.380            |
| <i>Trp53</i> <sup>ko/ko</sup>                                  | none      | 55                            | 1.9                                   | 3.1                                           | 0.350            |
| <i>Rad51c</i> <sup>ko/ko</sup> ; <i>Trp53</i> <sup>ko/ko</sup> | none      | 50                            | 0                                     | 10.6                                          | <b>0.001</b>     |
| <i>wt</i>                                                      | IR        | 55                            | 16.2                                  | 48.3                                          | n.a.             |
| <i>Rad51c</i> <sup>ko/+</sup>                                  | IR        | 52                            | 18.7                                  | 49.0                                          | 0.507            |
| <i>Trp53</i> <sup>ko/ko</sup>                                  | IR        | 50                            | 29.1                                  | 67.3                                          | <b>0.007</b>     |
| <i>Rad51c</i> <sup>ko/ko</sup> ; <i>Trp53</i> <sup>ko/ko</sup> | IR        | 51                            | 0                                     | 37.5                                          | <b>&lt;0.001</b> |

\*Statistically significant differences from wild-type cells are highlighted in bold (Wilcoxon text).
